# Supplementary material for: Evolutionary Conservation of Photophore Ultrastructure in Sharks: The Case of a Dalatiid Squalomorph
Source: MDPI journal article supplement (doi:10.3390/fishes8020087), 2023-02-01
Supplement: s1 [file s1]

Supplementary Materials

# Evolutionary Conservation of Photophore Ultrastructure in Sharks: The Case of a Dalatiid Squalomorph

Laurent Duchatelet <sup>1,\*</sup>, Charlotte Nuyt <sup>1,†</sup>, Nathan Puozzo <sup>2</sup>, Jérôme Mallefet <sup>1</sup> and Jérôme Delroisse <sup>2,\*</sup>

<sup>1</sup> Marine Biology Laboratory, Earth and Life Institute, Université catholique de Louvain—UCLouvain, 1348 Louvain-La-Neuve, Belgium

<sup>2</sup> Biology of Marine Organisms and Biomimetics, Research Institute for Biosciences, University of Mons—UMONS, 7000 Mons, Belgium

\* Correspondence: laurent.duchatelet@uclouvain.be (L.D.); jerome.delroisse@umons.ac.be (J.D.)

† These authors contributed equally to the work.

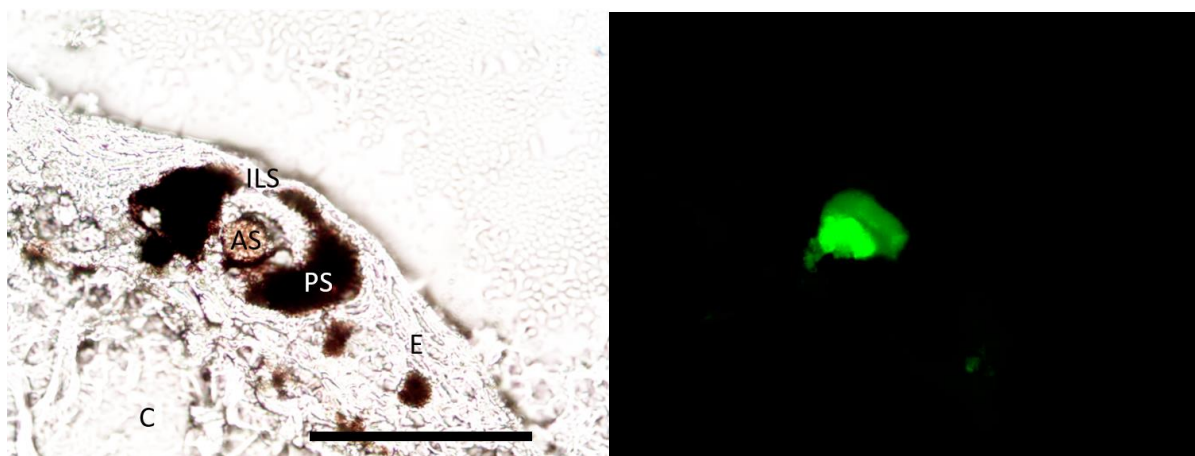

**Supplementary Figure S1:** Autofluorescence visualization of *Dalatias licha* photophore. Cross-section in a ventral skin photophore (left) and 495 nm excitation wavelength epifluorescence visualization of the same photophore underlying the green autofluorescence around and within the acidophilic vesicle of *D. licha* photocyte (right). Scale bars = 60  $\mu$ m. AS, acidophilic secretion; C, connective tissue; E, epidermis; ILS, iris-like structure cells; PS, pigmented sheath.

**Supplementary File S1:** Morphological measures of (A) photophore diameter ( $\mu\text{m}$ ), (B) photocyte diameter ( $\mu\text{m}$ ) and (C) pigmented zone area ( $\mu\text{m}^2$ ) performed on semi-thin sections of *Dalatias licha* photophores (N=44 observed photophores). Treatments: control (CT), melatonin (MT),  $\alpha$ -melanocyte stimulating hormone ( $\alpha$ -MSH).

(A)

| Observation number | CT               | MT               | $\alpha$ -MSH    |
|--------------------|------------------|------------------|------------------|
| 1                  | 66.55            | 51.40            | 57.59            |
| 2                  | 71.05            | 54.47            | 55.46            |
| 3                  | 63.33            | 54.32            | 60.01            |
| 4                  | 70.71            | 61.56            | 61.59            |
| 5                  | 70.32            | 58.77            | 62.32            |
| 6                  | 70.01            | 56.68            | 67.26            |
| 7                  | 54.17            | 50.53            | 58.75            |
| 8                  | 60.49            | 58.18            | 44.74            |
| 9                  | 72.05            | 57.08            | 53.20            |
| 10                 | 81.01            | 50.49            | 55.45            |
| 11                 | 82.84            | 57.75            | 65.49            |
| 12                 | 63.86            | 58.34            | 58.35            |
| 13                 | 57.39            | 66.03            |                  |
| 14                 | 70.64            | 56.53            |                  |
| 15                 | 56.17            | 45.98            |                  |
| 16                 | 74.03            | 55.01            |                  |
| Mean               | $67.79 \pm 2.06$ | $55.82 \pm 1.19$ | $58.35 \pm 1.72$ |
| Total mean         |                  | $60.86 \pm 1.26$ |                  |

(B)

| Observation number | CT               | MT               | $\alpha$ -MSH    |
|--------------------|------------------|------------------|------------------|
| 1                  | 36.71            | 25.72            | 36.41            |
| 2                  | 45.41            | 31.66            | 35.75            |
| 3                  | 36.49            | 30.25            | 41.34            |
| 4                  | 38.76            | 39.98            | 39.50            |
| 5                  | 37.46            | 36.31            | 39.80            |
| 6                  | 47.15            | 33.22            | 41.72            |
| 7                  | 26.29            | 32.70            | 35.62            |
| 8                  | 26.29            | 34.31            | 23.86            |
| 9                  | 43.41            | 34.92            | 23.32            |
| 10                 | 54.44            | 32.50            | 36.84            |
| 11                 | 54.48            | 36.45            | 34.36            |
| 12                 | 35.44            | 31.26            | 35.32            |
| 13                 | 31.59            | 47.50            |                  |
| 14                 | 42.88            | 39.96            |                  |
| 15                 | 31.15            | 29.51            |                  |
| 16                 | 41.44            | 34.13            |                  |
| Mean               | $39.34 \pm 2.13$ | $34.40 \pm 1.26$ | $35.32 \pm 1.73$ |
| Total mean         |                  | $36.45 \pm 1.05$ |                  |

(C)

| Observation number | CT                   | MT                  | $\alpha$ -MSH        |
|--------------------|----------------------|---------------------|----------------------|
| 1                  | 2420.11              | 1555.53             | 1563.91              |
| 2                  | 2345.55              | 1550.56             | 1411.34              |
| 3                  | 2103.95              | 1598.41             | 1486.45              |
| 4                  | 2746.63              | 1721.08             | 1754.14              |
| 5                  | 2781.83              | 1677.78             | 1806.02              |
| 6                  | 1969.40              | 1656.95             | 2186.34              |
| 7                  | 1761.61              | 1165.63             | 1714.56              |
| 8                  | 1973.52              | 1734.09             | 1124.81              |
| 9                  | 2596.78              | 1601.66             | 1796.14              |
| 10                 | 2825.54              | 1172.72             | 1348.94              |
| 11                 | 3058.39              | 1576.08             | 2441.42              |
| 12                 | 2217.11              | 1905.62             | 1694.44              |
| 13                 | 1803.17              | 1652.32             |                      |
| 14                 | 2474.69              | 1255.40             |                      |
| 15                 | 1715.45              | 976.20              |                      |
| 16                 | 2955.40              | 1461.46             |                      |
| Mean               | 2359.32 $\pm$ 110.51 | 1516.34 $\pm$ 62.23 | 1694.04 $\pm$ 103.39 |
| Total mean         |                      | 1871.34 $\pm$ 77.88 |                      |

**Supplementary File S2:** Morphological data and statistics performed on the granular inclusions present within the granular area of *Dalatias licha* ultrastructurally-depicted photocytes according to different treatments: control, melatonin (MT), and  $\alpha$ -melanocyte stimulating hormone ( $\alpha$ -MSH). Data and statistics for (A) the granular inclusion coverage (expressed in %), (B) the granular inclusion density ( $\mu\text{m}^{-2}$ ), and (C) the granular inclusion surface ( $\mu\text{m}^2$ ). \*\*\* represents statistical differences (ns, non-significant, \*  $p \leq 0.05$ , \*\*  $p \leq 0.01$ , \*\*\*  $p \leq 0.001$ ).

(A)

|               | Observation number         |       |       |       |       |       | Mean             |
|---------------|----------------------------|-------|-------|-------|-------|-------|------------------|
|               | 1                          | 2     | 3     | 4     | 5     | 6     |                  |
| CT            | 18.27                      | 9.30  | 19.14 | 5.16  | 15.18 | 1.12  | 11.36 $\pm$ 3.00 |
| MT            | 67.80                      | 57.44 | 62.82 | 61.33 | 65.66 | 62.27 | 62.89 $\pm$ 1.46 |
| $\alpha$ -MSH | 35.30                      | 38.31 | 54.47 | 49.63 | 53.80 | 38.62 | 45.02 $\pm$ 3.50 |
| Control       |                            |       |       |       |       |       | $\alpha$ -MSH    |
| $\alpha$ -MSH | 2.613 e <sup>-05</sup> *** |       |       |       |       |       | /                |
| MT            | 2.674 e <sup>-08</sup> *** |       |       |       |       |       | 0.0008328 ***    |

(B)

|               | Observation number |       |      |       |       |       | Mean             |
|---------------|--------------------|-------|------|-------|-------|-------|------------------|
|               | 1                  | 2     | 3    | 4     | 5     | 6     |                  |
| CT            | 5.33               | 2.62  | 0.67 | 3.08  | 3.01  | 2.01  | 2.79 $\pm$ 0.63  |
| MT            | 4.47               | 11.69 | 6.99 | 10.39 | 6.58  | 6.02  | 7.69 $\pm$ 1.13  |
| $\alpha$ -MSH | 4.94               | 15.74 | 7.27 | 10.22 | 10.39 | 19.80 | 11.39 $\pm$ 2.24 |
| CT            |                    |       |      |       |       |       | $\alpha$ -MSH    |
| $\alpha$ -MSH | 0.004098 ***       |       |      |       |       |       | /                |
| MT            | 0.003463 ***       |       |      |       |       |       | 0.1707           |

(C)

|               | Observation number |       |       |       |       |       | Mean              |
|---------------|--------------------|-------|-------|-------|-------|-------|-------------------|
|               | 1                  | 2     | 3     | 4     | 5     | 6     |                   |
| CT            | 0.035              | 0.030 | 0.029 | 0.015 | 0.065 | 0.006 | 0.030 $\pm$ 0.008 |
| MT            | 0.152              | 0.053 | 0.091 | 0.078 | 0.100 | 0.103 | 0.096 $\pm$ 0.013 |
| $\alpha$ -MSH | 0.071              | 0.024 | 0.075 | 0.052 | 0.052 | 0.020 | 0.049 $\pm$ 0.009 |
| CT            |                    |       |       |       |       |       | $\alpha$ -MSH     |
| $\alpha$ -MSH | 0.1559             |       |       |       |       |       | /                 |
| MT            | 0.001807 ***       |       |       |       |       |       | 0.01638 ***       |
